# Supplementary material for: The FinR-regulated essential gene fprA, encoding ferredoxin NADP+ reductase: Roles in superoxide-mediated stress protection and virulence of Pseudomonas aeruginosa
Source: PubMed Central journal article supplement (PMC5302815; doi:10.1371/journal.pone.0172071), 2017-02-10
Supplement: pone.0172071.s001.pdf [file pone.0172071.s001.pdf]

## A FprA

**Pae** MSNLYTERVLSVHHWNTLFSFKTTRNPLGRFKTGQFVMIGLEVD-GRPLMRAYSIASPN  
**Ppu** MSNMNHERVLSVHHWNTLFSFKCTRDPGLRFENGQFVMIGLQQDNGRPLMRAYSIASPN  
**Avi** MSNLNVERVLSVHHWNTLFSFKTTRNPSLRFENGQFVMIGLEVD-GRPLMRAYSIASPN  
\*\*\*: \*\*\*\*\* \*\*:\*.\*\*\*: .\*\*\*\*\*: \* \*\*\*\*\*

**Pae** YEEHLEFFSIKVPDGPLTSRLQHLKEGDELMVSRKPTGTLVHDDLPGKHLVLLSTGTGM  
**Ppu** WEEHLEFFSIKVPDGPLTSRLQHLKEGDEIIISKKPTGTLVDDLNPGLKHLVLLSTGTGL  
**Avi** YEEHLEFFSIKVQNGPLTSRLQHLKEGDELMVSRKPTGTLVTSDLLPGKHLVLLSTGTGL  
:\*\*\*\*\* :\*\*\*\*\*:\*\*\*\*\*:.:\*.\*\*\*\*\* .\*\* \*\*\*\*\*:\*\*\*\*\*:

**Pae** APFLSVIQDPETYERYEKVILVHGVRVWSELAYADFITKVLPEHEYFGDQVKEKLIYYPL  
**Ppu** APFMSVIQDPETYERFEKVILVHGVRVYVNEVAYREFITEHLPQNEFFGESVRDKLIYYPT  
**Avi** APFMSLIQDPEVYERFEKVILVHGVRVQVNELAYQQFITEHLPQSEYFGEAVKEKLIYYPT  
\*\*\*:\*.\*\*\*\*\*.\*\*\*:\*\*\*:\*.\*\*\*\*\* \*.\*:\*\* :\*\*\*: \*\* :\*:\*: \*.:\*\*\*\*\*

**Pae** VTREPFNRQGRQTDLMRSGKLFEDIGLPPMNPQDDRAMICGSPSMLEETSAVLDSFGLKI  
**Ppu** VTREPFENQGRQTDLMRSGKLFSDIGLPPINPQDDRAMICGSPSMLEDETSEVLDSFGLKI  
**Avi** VTRESFHNQGRQTDLMRSGKLFEDIGLPPINPQDDRAMICGSPSMLEDESCEVLDFGLKI  
\*\*\*\*.\*.\*\*\*\*\* \*\*\*\*\*.\*\*\*\*\*:\*\*\*\*\*:\*\*\*\*\*:\*.:. \*\*\*.\*\*\*\*\*

**Pae** SPRMGEPGDYLIERAFVEK  
**Ppu** SPRMREPGDYLIERAFVEK  
**Avi** SPRMGEPGDYLIERAFVEK  
\*\*\*\* \*\*\*\*\*

## B FinR

**Pae** MKFTLRQLEVFVAVAAQESVSRAAEGLSLSQSATSSTSLGELERQFDCKLFDKAGKRLTLN  
**Ppu** MRFTLRQMVFVAVAQHQSVSRAASLLALSQSAASTSITELERQSSCQLFDRAGKRLALN  
**Avi** MRFTLRQLEVFVAVARLESVTRAAESLSLSQSAASTSITELERQSDCQLFDRVGRKRLKLN  
\*:\*\*\*\*\*:.\*.\*\*\*: :\*\*:\*.. \*:\*\*\*\*\*:\*\*\*: \*\*\*\*\* .\*:\*\*\*\*\*.\*\*\*\* \*\*

**Pae** ALGRQLLPQAVALLDRGEEIENLLNGKTAFGSLDLGATLTIGNYLATLLIGAFMQRQPC  
**Ppu** ALGHQLLPQAVALLDQAKEIEDLLNGKSGFGSLAVGATLTIGNYLATLLIGNYMQTHPES  
**Avi** ALGRQLLPQAVALLNQAREIENLLDGKEGFGSLAVGATLTIGNYLATLLIGAFMQRHPES  
\*\*\*:\*\*\*\*\*:.\*.\*\*\*:\*\*\*:\*. \*\*\*\*\* :\*\*\*\*\*:\*\*\*\*\* :\*\* :\*:.:

**Pae** RVRLHVHNTAQVVQVAHYELDGLIEGDCRHPDIEVQPWMEDELVVFCAPQHPLARRGG  
**Ppu** QVKLHVQNTAHIVQVVAHYEIDLGLIEGDCNHPDLEVQPWVEDELVVFCAPQHPLAKLGR  
**Avi** RVRLHVQNTAHIVQVNVNHELDGLIEGNCQHPDVELQPWVEDELVVFCAPQHPLARHGR  
:\*.\*\*\*:\*\*\*:.\*.\*\*\*:.:\*.\*\*\*\*\*:\*.\*\*\*:\*.\*\*\*:\*\*\*\*\*:\*\*\*\*\*: \*

**Pae** ADLERLTREAWILREQSGTRTLTFDQAMRHHPRPLNIRLELEHTEAIKRAVESGLGIGCI  
**Ppu** ADIESLSQEAWILREQSGTRTLTFDQAMRHHANLNIRLELEHTEAIKRAVESGLGIGCI  
**Avi** ATLDELAGEAWILREQSGTRTLTFDQAMRHRPMLNIRLELEHTEAIKRAVESGLGIGCI  
\* :. \*: \*\*\*\*\* \*\*\*\*\*.\*\*\*\*\*

**Pae** SRLALRDAFRGSLVPVETPGLDLRRQFYFIWHKQKYQTATMREFLDLCRSETAGISRSD  
**Ppu** SRLALRDAFRGSLVPVETPELDLLRQFYFIWHKQKYQTSAMREFLELCRNFTAGFTRSD  
**Avi** SRLALRDAFRGSLVPVETPQLDLKRQFCFLWHKQKLHTAAMREFLEQCRALTAGVRRSD  
\*\*\*\*\* \*\* \*\* \*:\*\*\*\*\* :\*.:\*\*\*\*\*: \*\* \*\* . \*\*

**Pae** EIVLPLIP  
**Ppu** EIVLPPIA  
**Avi** EIVLPPIA  
\*\*\*\*\* \*

S1 Fig. Multiple amino acid sequence alignment of *P. aeruginosa* FprA and FinR.
